# Supplementary material for: CH bond activation in aromatic ketones mediated by iridium-tris(pyrazolyl)borate complexes
Source: Royal Society of Chemistry journal article supplement (doi:10.1039/d3dt02849f), 2023-01-01
Supplement: d3dt02849f1.pdf [file d3dt02849f1.pdf]

## **C-H Bond-activation in aromatic ketones mediated by Iridium-Tris(pyrazolyl) borate complexes**

M. Ortiz-Hernández,<sup>a</sup> V. Salazar-Pereda,<sup>a\*</sup> D. Mendoza-Espinosa,<sup>a\*</sup> M. A. Gomez-Bonilla,<sup>a</sup> C. Cristobal,<sup>b</sup> M. C. Ortega-Alfaro,<sup>c</sup> A. Suárez<sup>d</sup> and C. I. Sandoval-Chavez<sup>c</sup>

- a) Área Académica de Química, Universidad Autónoma del Estado de Hidalgo, Carretera Pachuca-Tulancingo Km. 4.5, Mineral de la Reforma, Hidalgo, 42090, México.
- b) Departamento de Química, División de Ciencias Naturales y Exactas, Universidad de Guanajuato, Campus Noria Alta, Guanajuato, 36050, México.
- c) Instituto de Ciencias Nucleares, Universidad Nacional Autónoma de México, Circuito Exterior, Ciudad Universitaria, Alcaldía Coyoacán, 04510, México.
- d) Instituto de Investigaciones Químicas, Departamento de Química Inorgánica, CSIC-Universidad de Sevilla, Avda. Américo Vespucio 49, 41092, Sevilla, España.

### Contents:

- 1) Sample <sup>1</sup>H and <sup>13</sup>C NMR spectra for new products.
- 2) FT-IR spectra of all complexes
- 3) ORTEP figures for complexes **6** and **7**
- 4) NMR spectra for the products of reduction catalytic transfer hydrogenation.

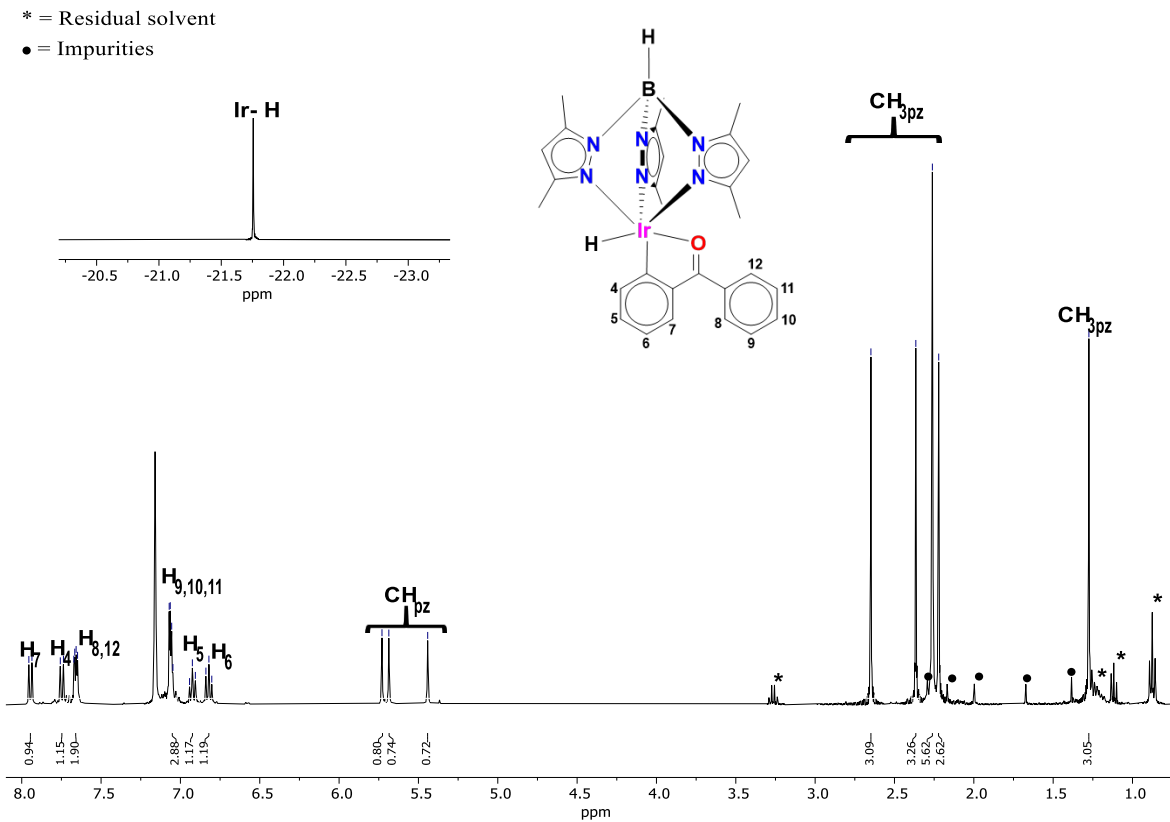

Figure S-1. <sup>1</sup>H NMR (400 MHz) spectrum for **2** in CDCl<sub>3</sub>.

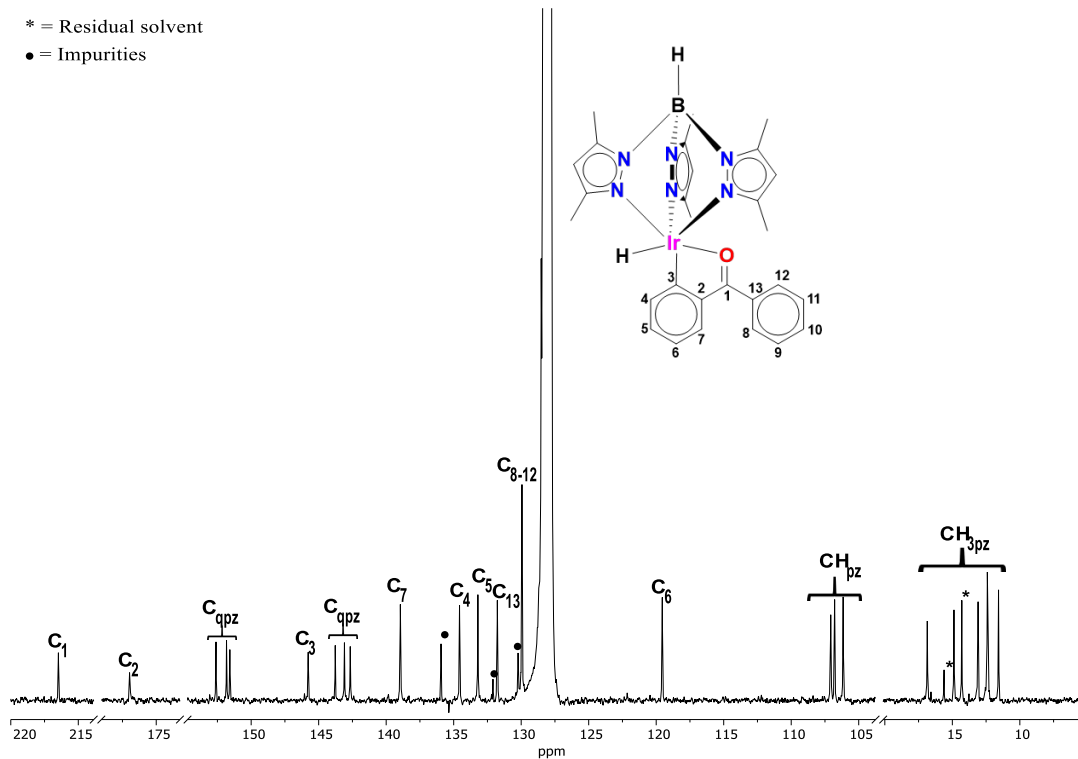

Figure S-2. <sup>13</sup>C NMR (100 MHz) spectrum for **2** in CDCl<sub>3</sub>.

\* = Residual solvent

• = Impurities

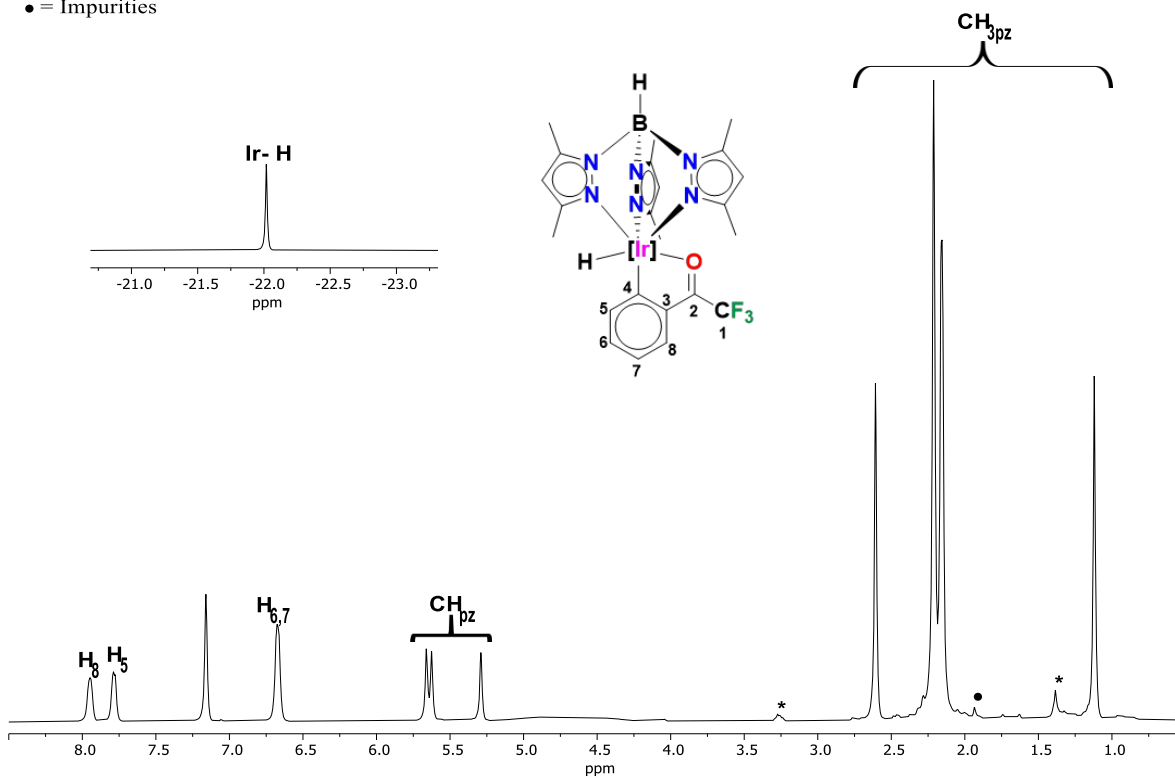

Figure S-3.  $^1\text{H}$  NMR (400 MHz) spectrum for **3** in  $\text{CDCl}_3$ .

\* = Residual solvent peaks

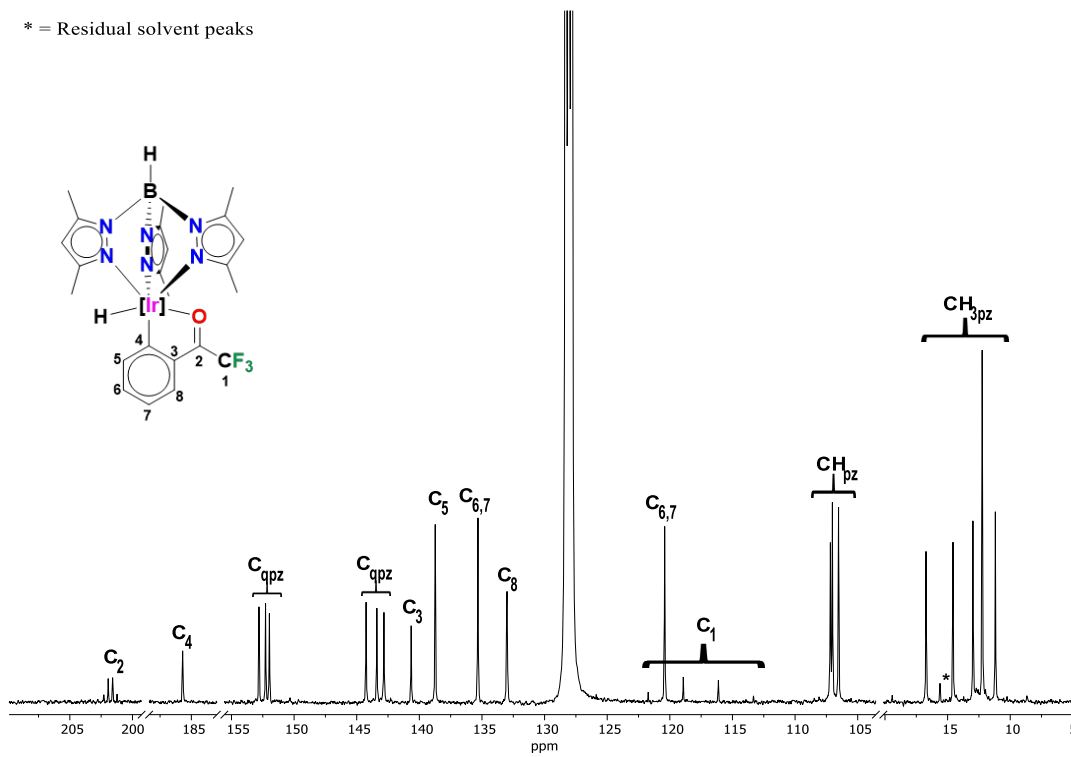

Figure S-4.  $^{13}\text{C}$  NMR (100 MHz) spectrum for **3** in  $\text{CDCl}_3$ .

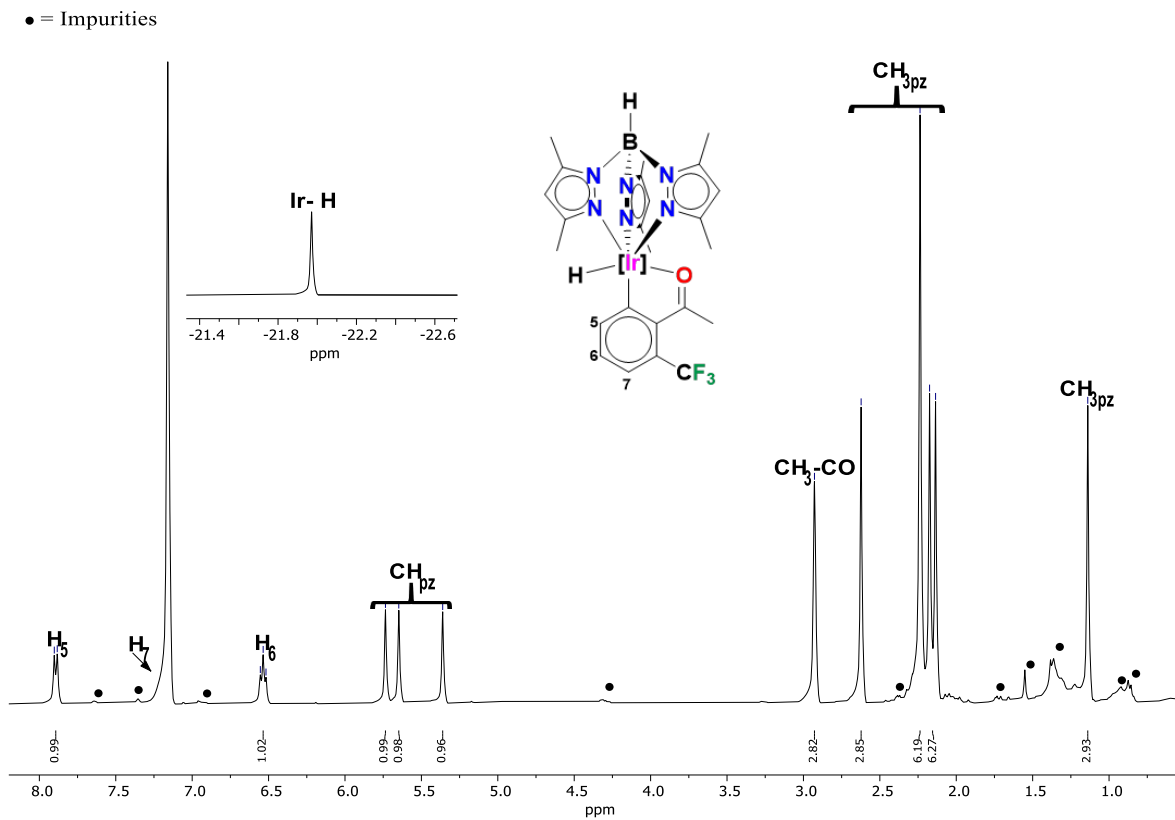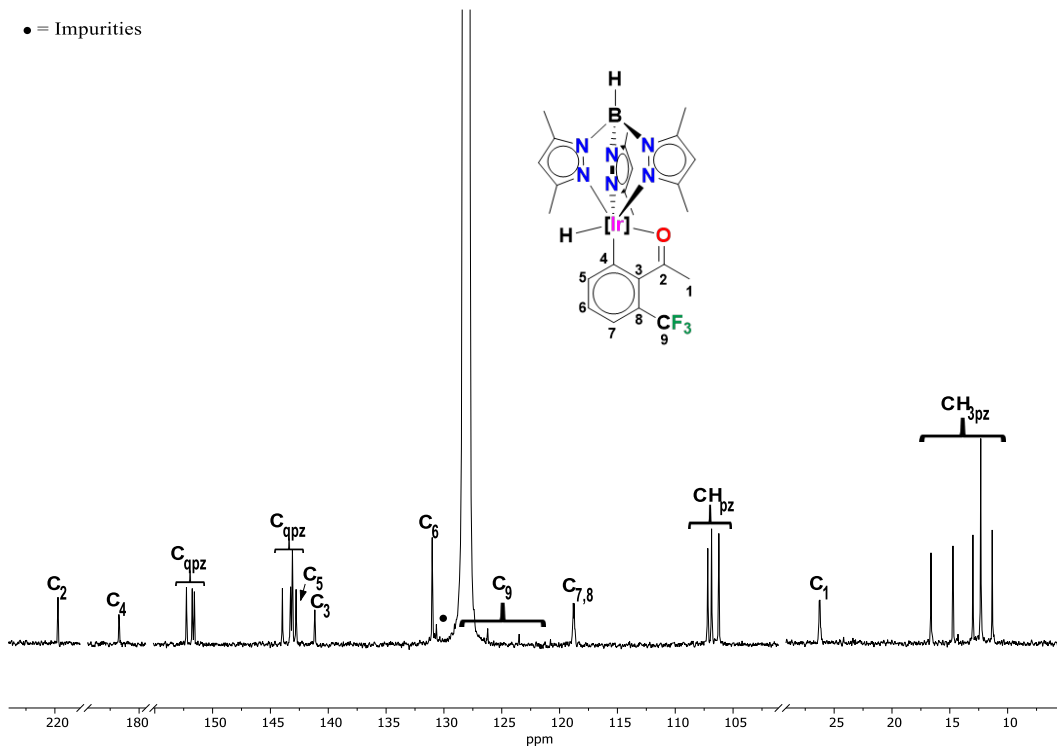

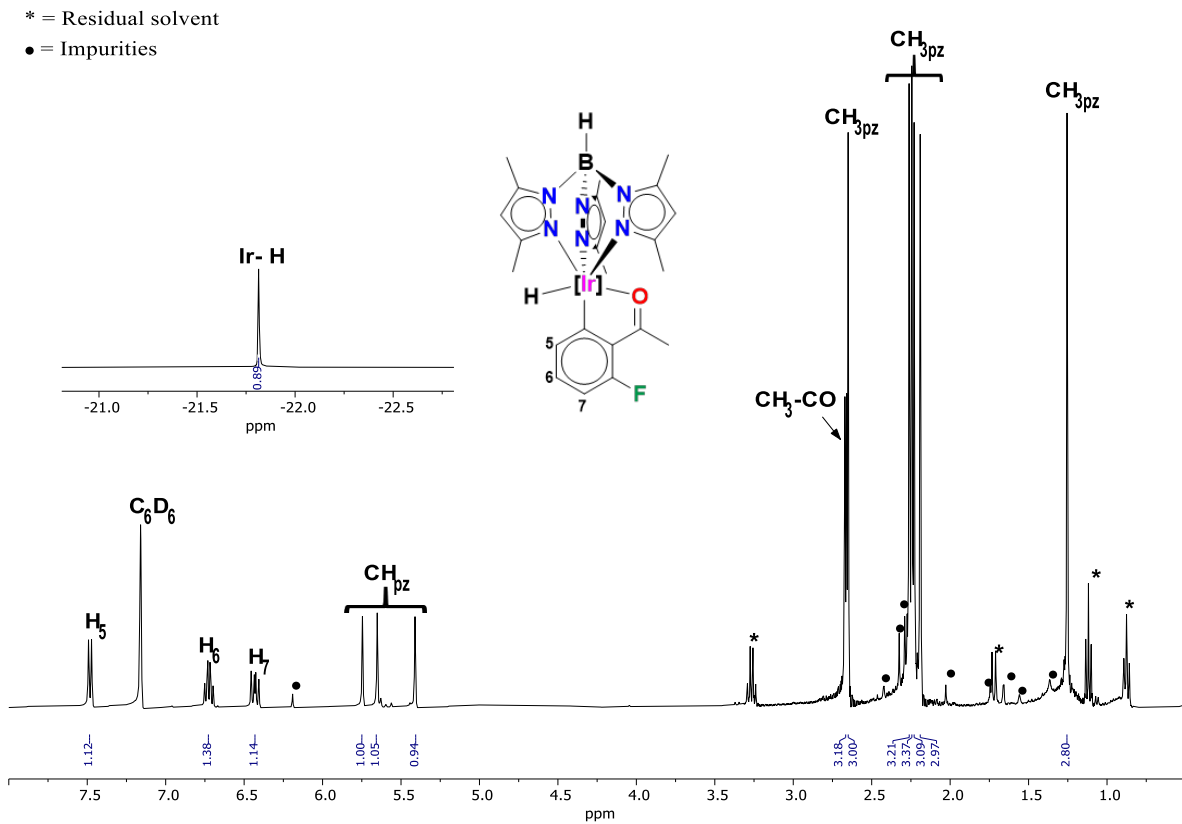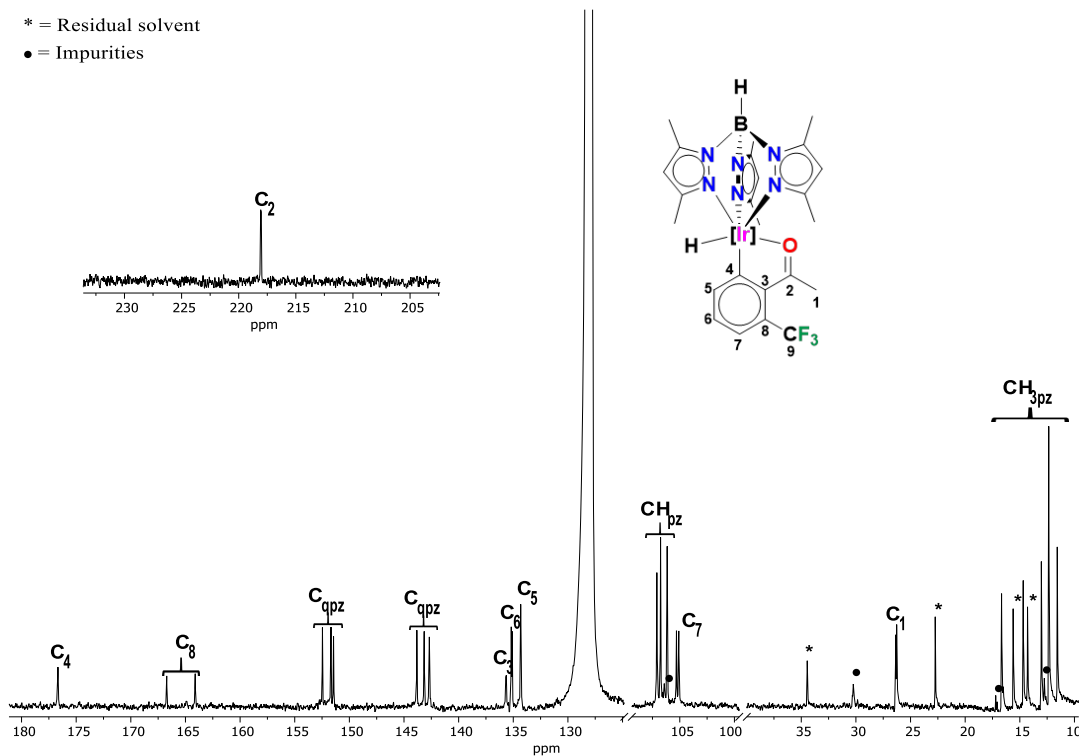

\* = Residual solvent

• = Impurities

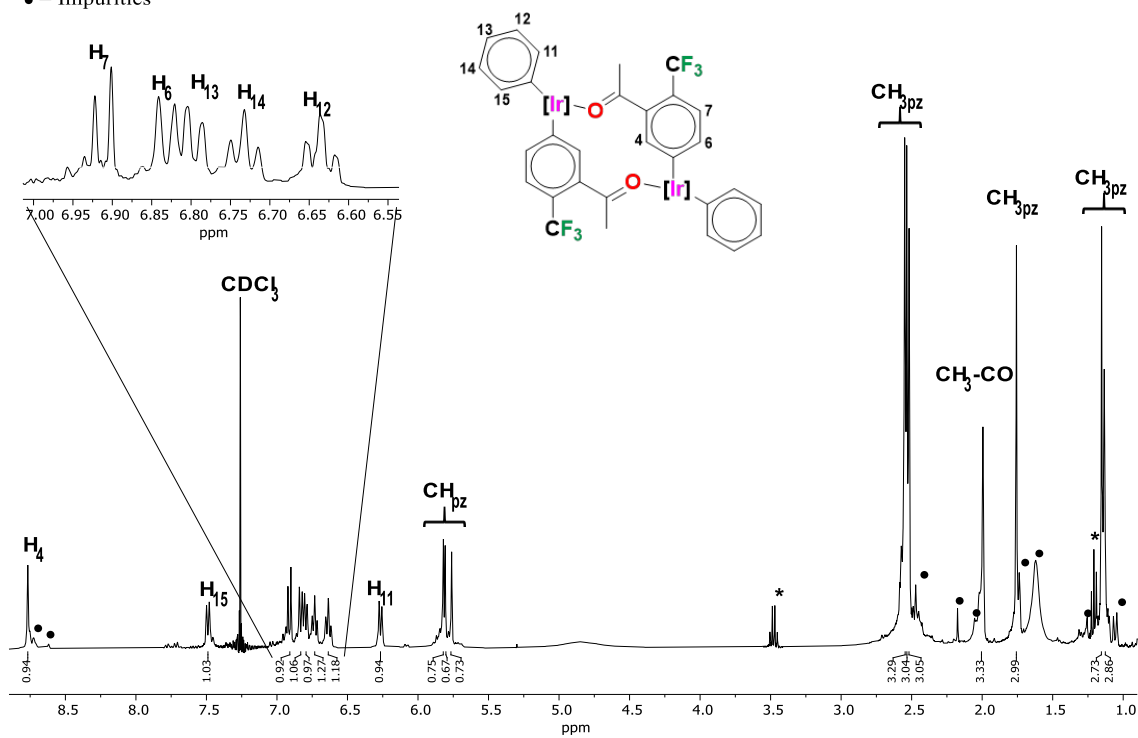

Figure S-9.  $^1\text{H}$  NMR (400 MHz) spectrum for **7** in  $\text{CDCl}_3$ .

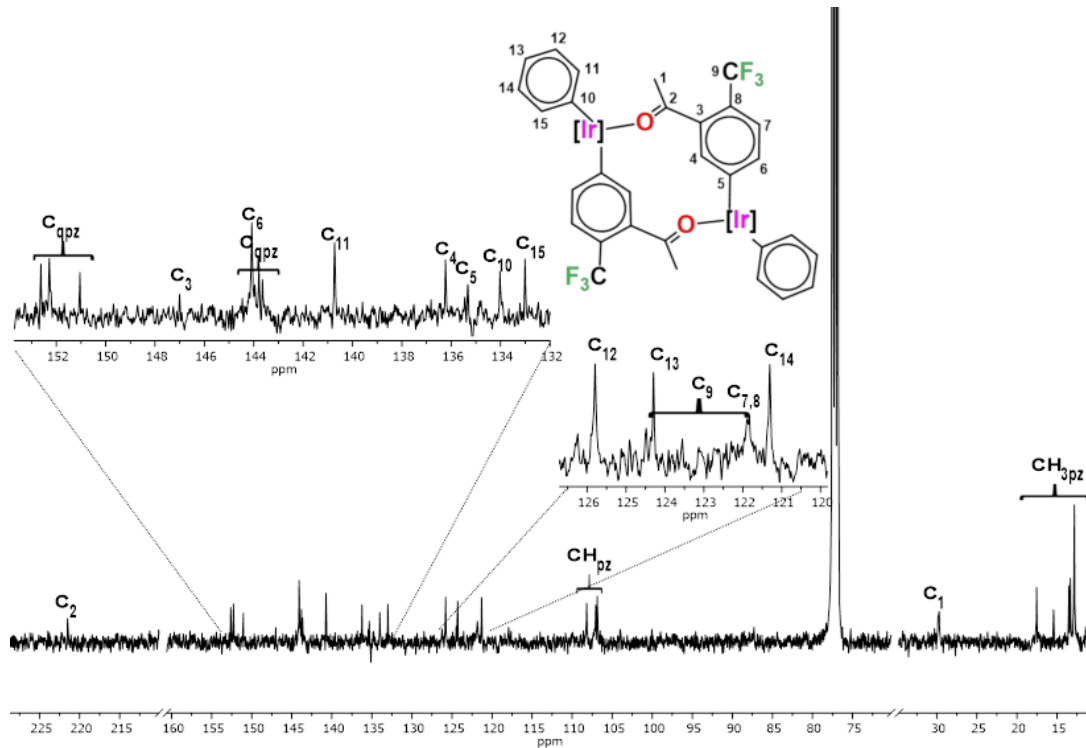

Figure S-10.  $^{13}\text{C}$  NMR (100 MHz) spectrum for **7** in  $\text{CDCl}_3$ .

\* = Residual solvent  
 ● = Impurities

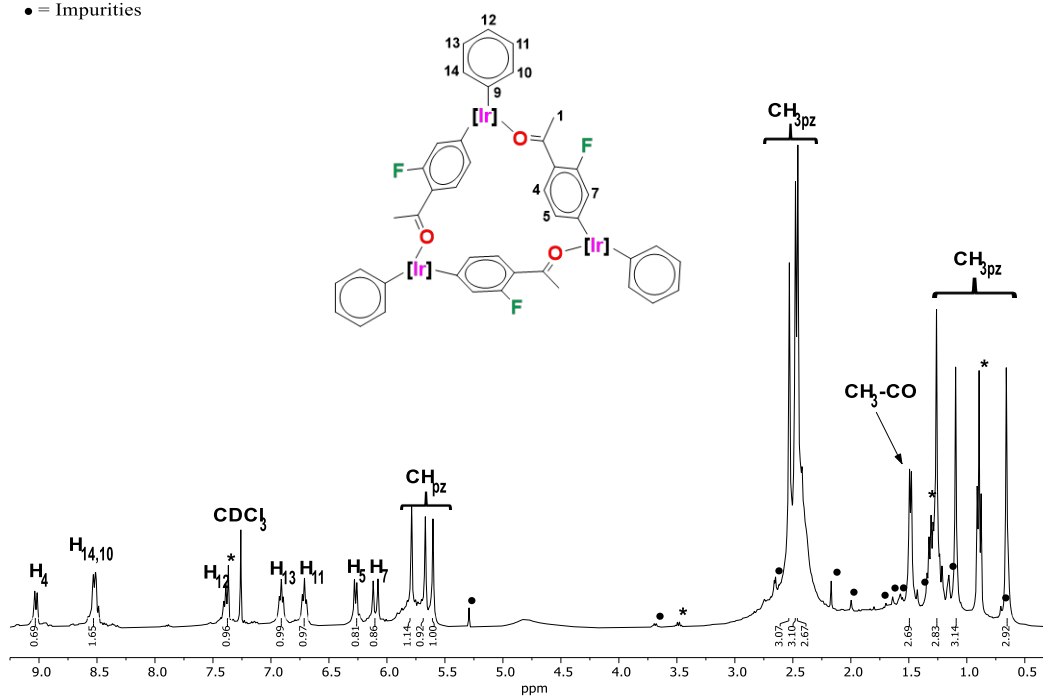

Figure S-11.  $^1\text{H}$  NMR (400 MHz) spectrum for **8** in  $\text{CDCl}_3$ .

\* = Residual solvent  
 ● = Impurities

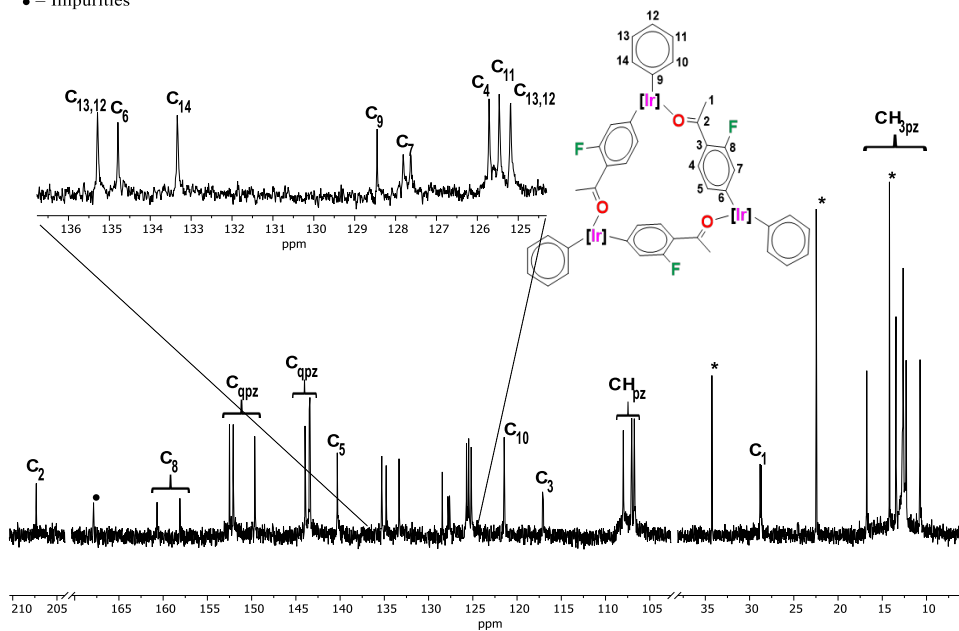

Figure S-12.  $^{13}\text{C}$  NMR (100 MHz) spectrum for **8** in  $\text{CDCl}_3$ .

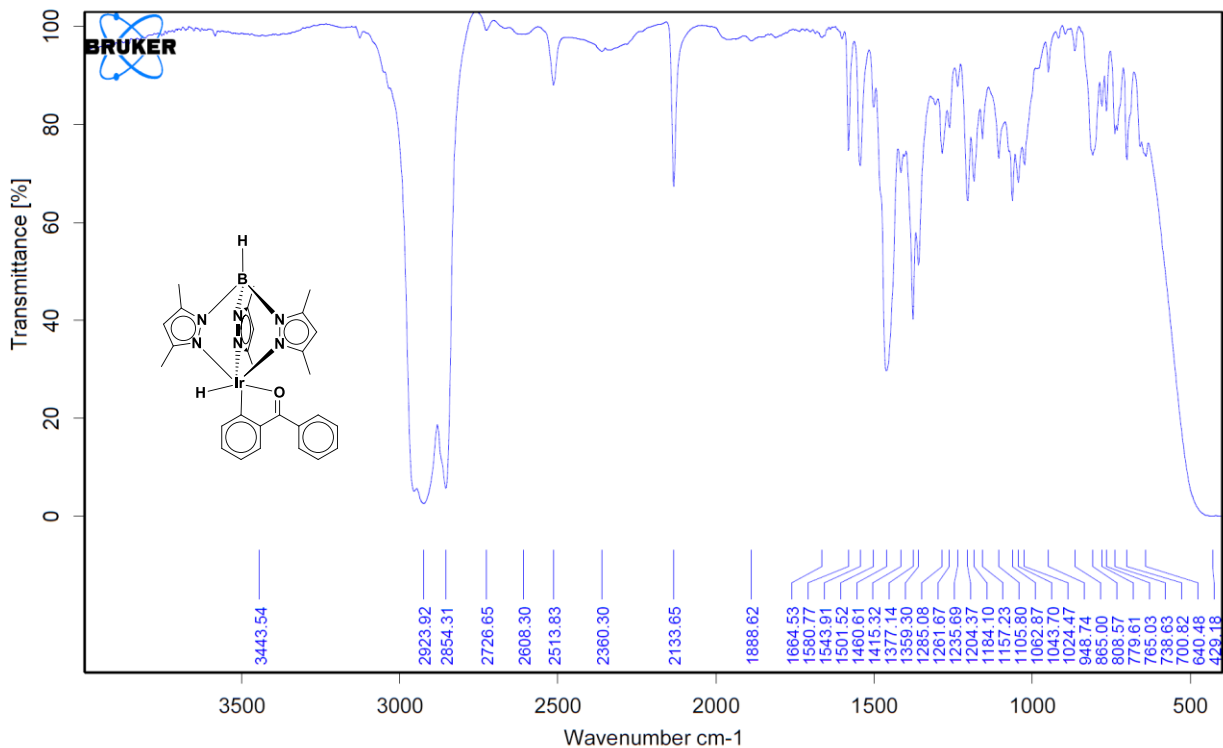

Figure S-13. Spectrum of infrared for complex 2 in nujol.

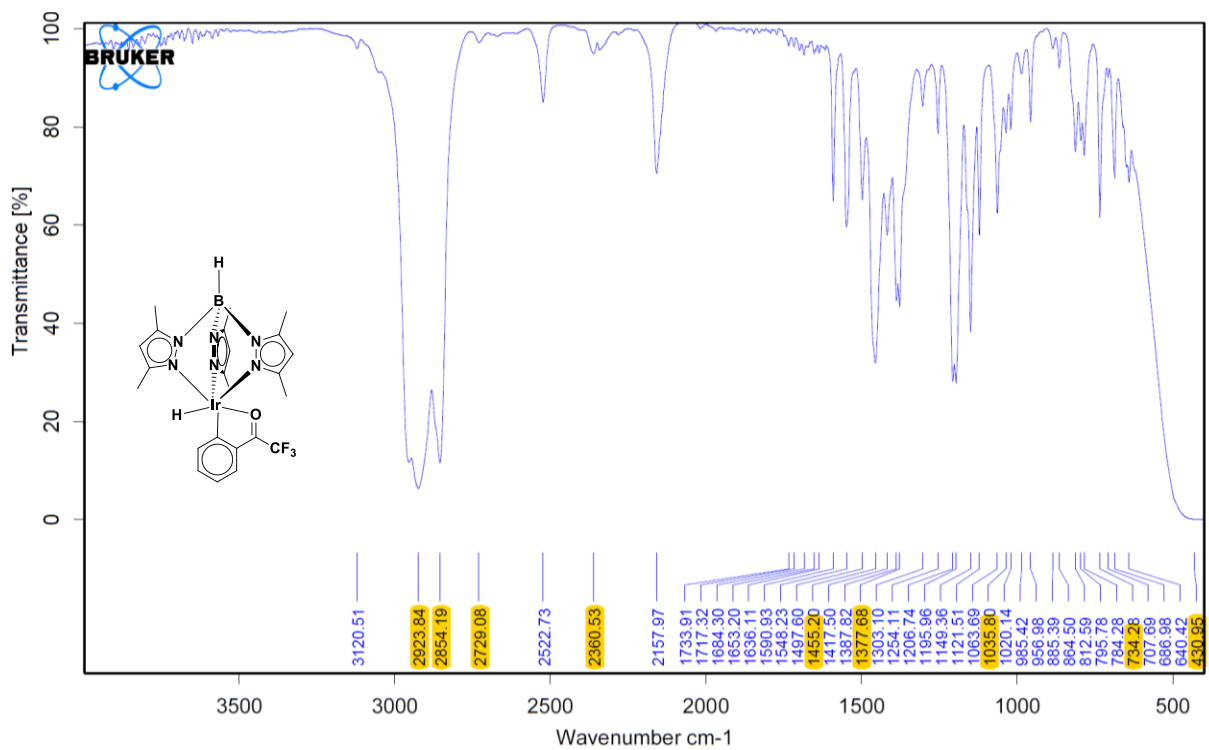

Figure S-14. Spectrum of infrared for complex 3 in nujol.



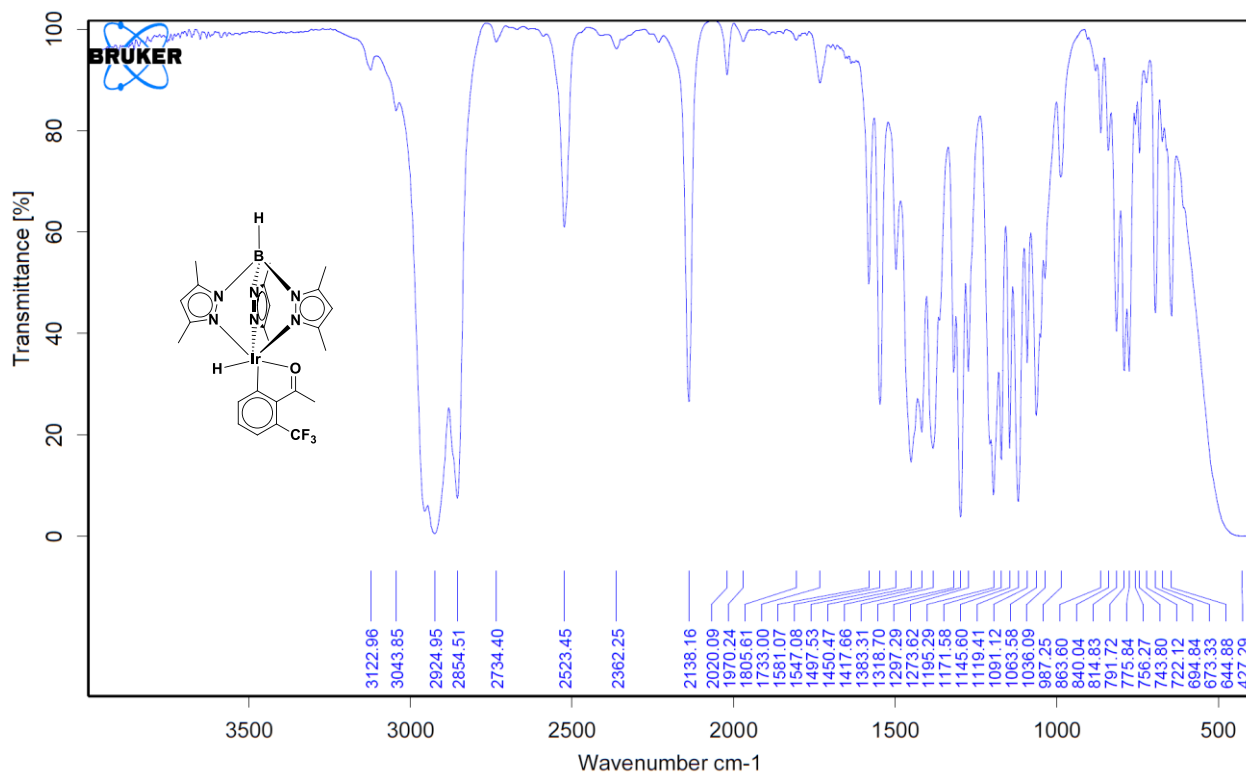

Figure S-15. Spectrum of infrared for complex 4 in nujol.

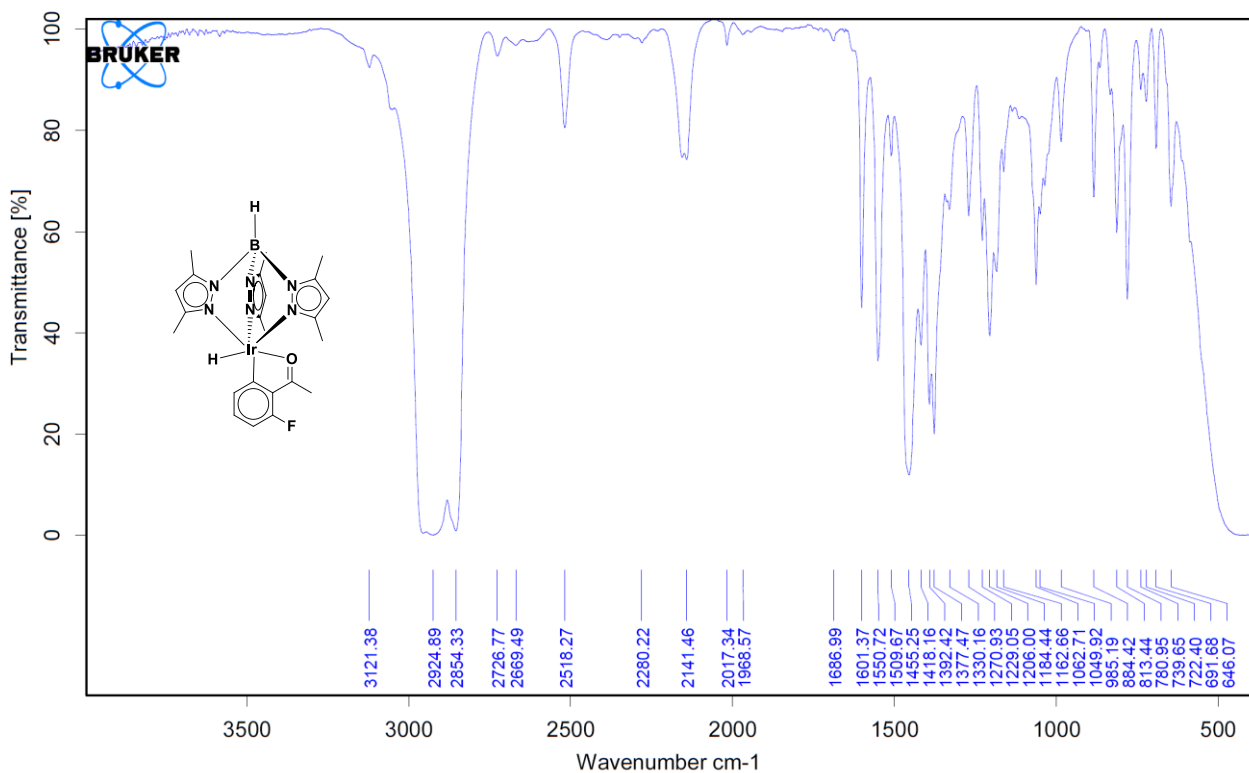

Figure S-16. Spectrum of infrared for complex 5 in nujol.

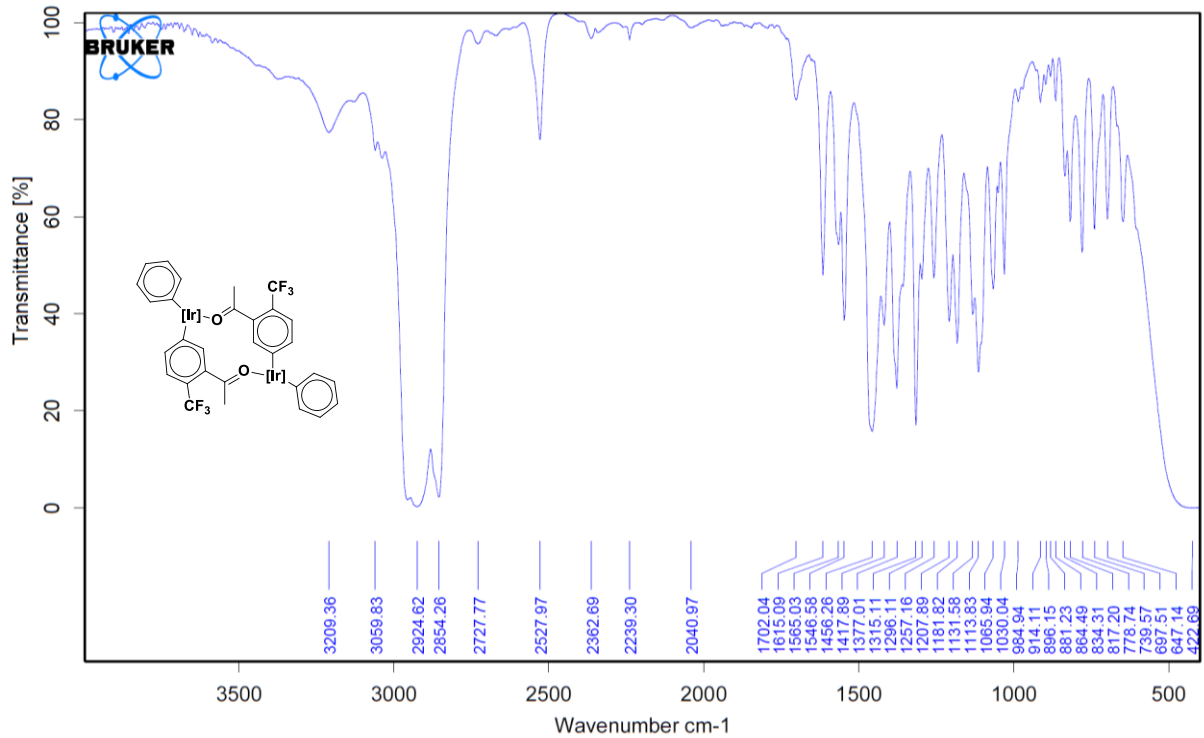

Figure S-17. Spectrum of infrared for complex **7** in nujol.

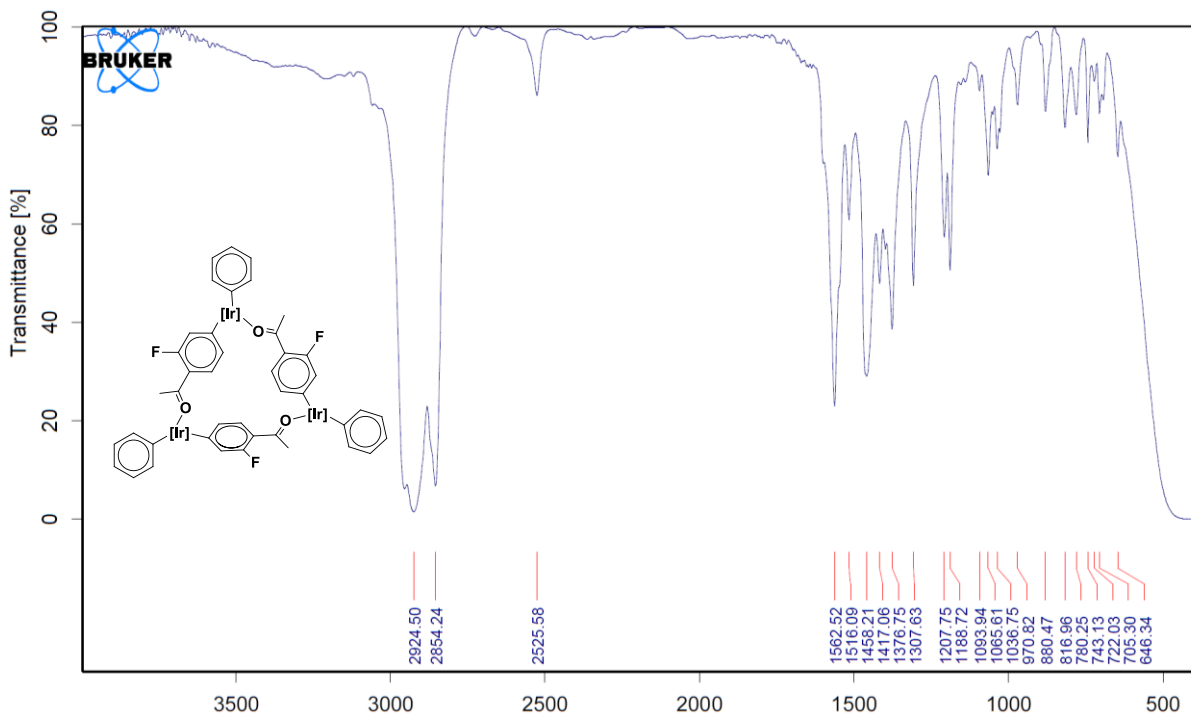

Figure S-18. Spectrum of infrared for complex **8** in nujol.

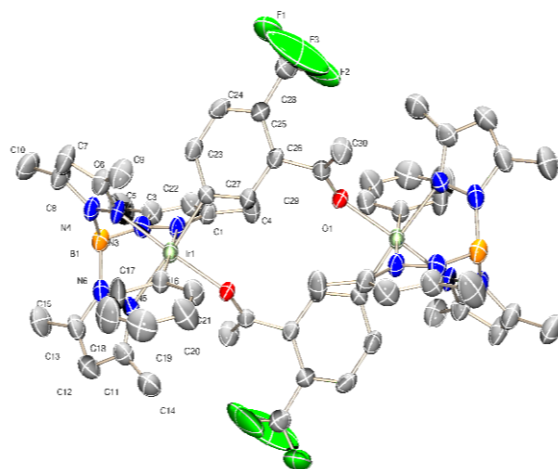

Figure S-19. ORTEP diagram of complex **7**. Ellipsoids are shown at 50 % probability level.

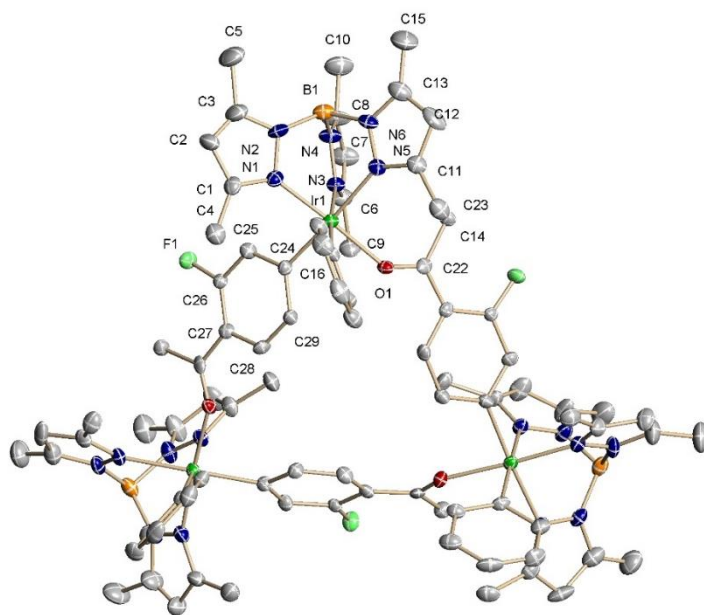

Figure S-20. ORTEP diagram of complex **8**. Ellipsoids are shown at 50% probability level.

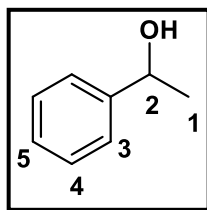

$^1\text{H NMR}$  (400 MHz,  $\text{CDCl}_3$ )  $\delta$  7.35 (d,  $^3J = 7.9$  Hz, 2H, H3), 7.32 (t,  $^3J = 7.9$  Hz, 2H, H4), 7.25 (t,  $^3J = 6.7$  Hz, 1H, H5), 4.88 (q,  $^3J = 6.5$  Hz, 1H, H2), 1.83 (br. s, 1H, OH), 1.48 (d,  $^3J = 6.5$  Hz, 3H, H1).

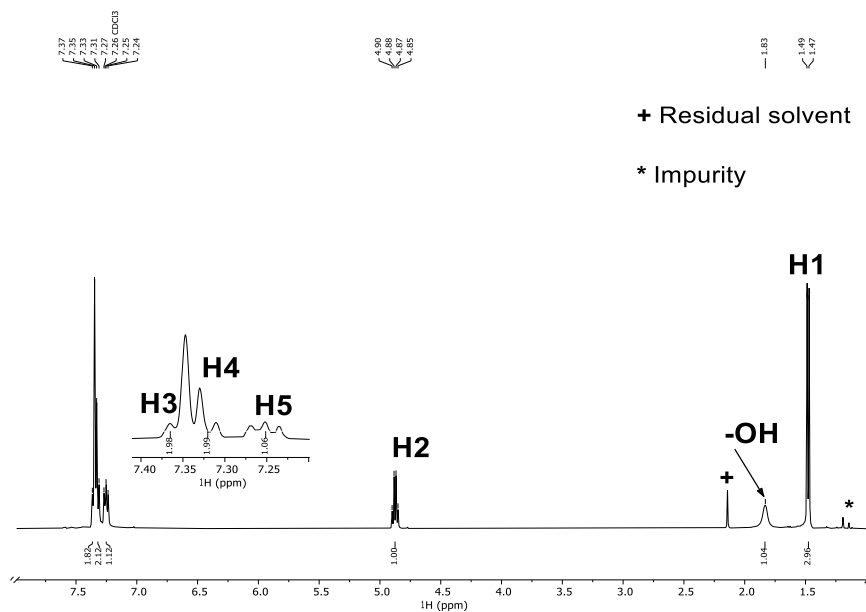

Figure S-21.  $^1\text{H NMR}$  (400 MHz) spectrum of 1-Phenylethanol in  $\text{CDCl}_3$ .

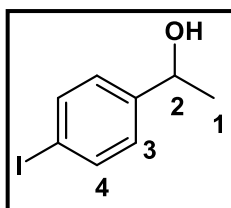

$^1\text{H NMR}$  (400 MHz,  $\text{CDCl}_3$ )  $\delta$  7.67 (d,  $^3J = 8.3$  Hz, 2H, H4), 7.12 (d,  $^3J = 8.4$  Hz, 2H, H3), 4.85 (q,  $^3J = 6.5$  Hz, 1H, H2), 1.84 (br. s, 1H, OH), 1.47 (d,  $^3J = 6.5$  Hz, 3H, H1).

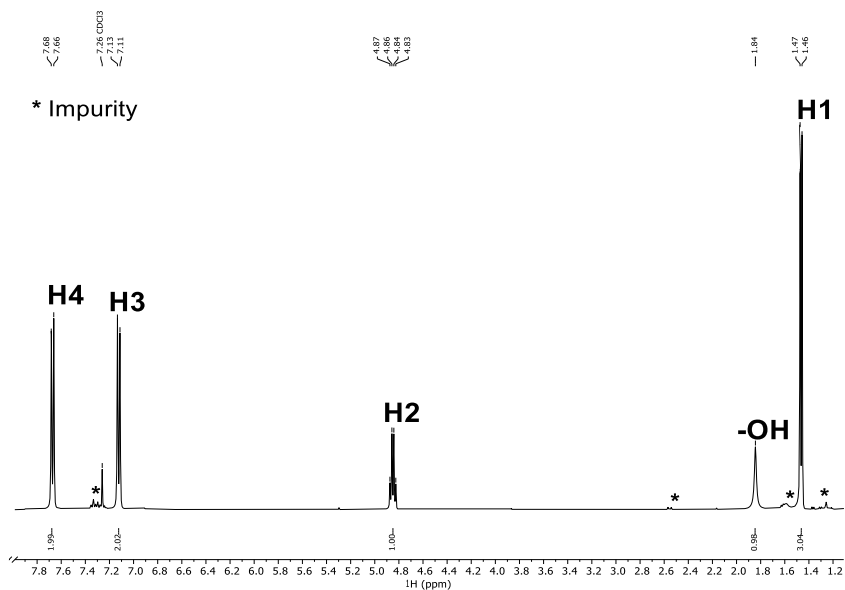

Figure S-22.  $^1\text{H NMR}$  (400 MHz) spectrum of 1-(4-Iodophenyl)ethanol in  $\text{CDCl}_3$ .

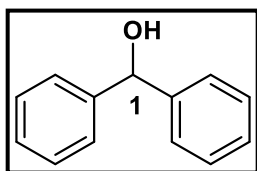

**$^1\text{H}$  NMR (400 MHz,  $\text{CDCl}_3$ )**  $\delta$  7.23 - 7.17 (m, 10H,  $H_{\text{aromatic}}$ ), 5.75 (s, 1H,  $H1$ ), 2.10 (br. s, 1H,  $OH$ ).

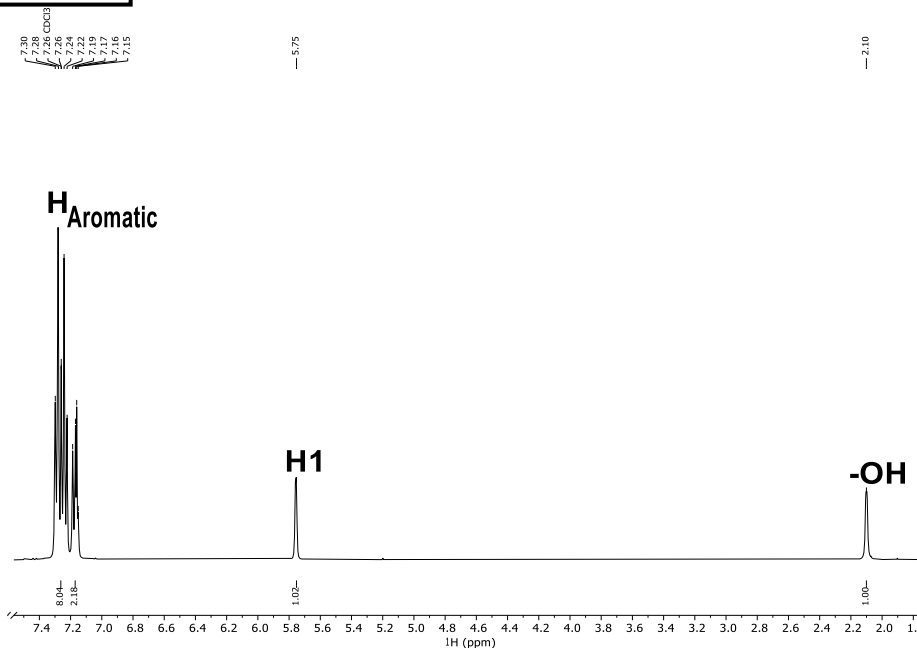

Figure S-23.  $^1\text{H}$  NMR (400 MHz) spectrum of Diphenylmethanol in  $\text{CDCl}_3$ .

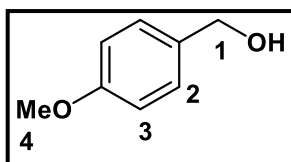

**$^1\text{H}$  NMR (400 MHz,  $\text{CDCl}_3$ )**  $\delta$  7.20 (d,  $^3J = 8.8$  Hz, 2H,  $H2$ ), 6.81 (d,  $^3J = 8.8$  Hz, 2H,  $H3$ ), 4.51 (s, 2H,  $H1$ ), 3.72 (s, 3H,  $H4$ ), 2.00 (br. s, 1H,  $OH$ ).

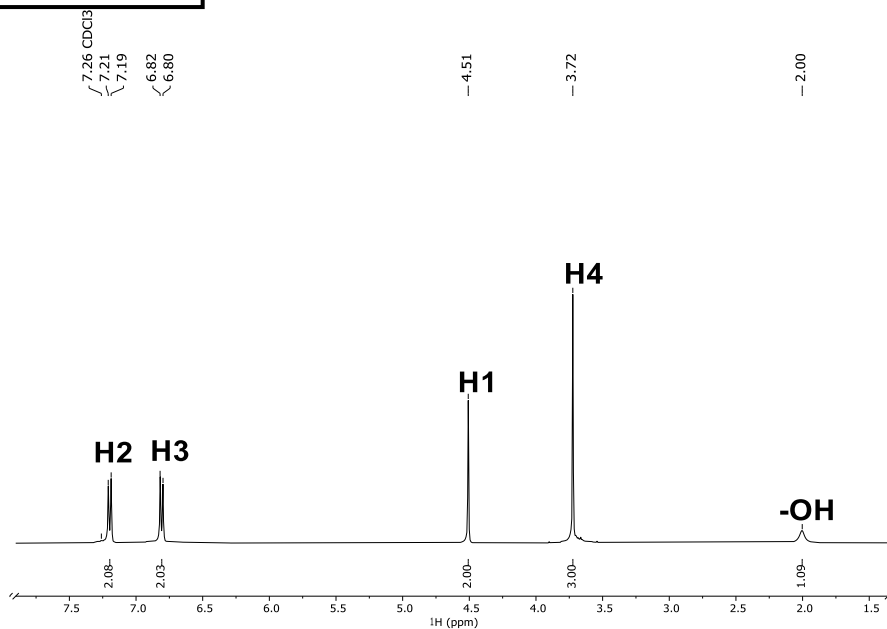

Figure S-24.  $^1\text{H}$  NMR (400 MHz) spectrum of 4-Methoxybenzyl alcohol in  $\text{CDCl}_3$ .

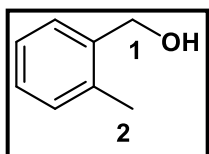

$^1\text{H NMR}$  (400 MHz,  $\text{CDCl}_3$ )  $\delta$  7.40 (m, 1H,  $H_{\text{aromatic}}$ ), 7.24 (m, 3H,  $H_{\text{aromatic}}$ ), 4.72 (s, 2H,  $H1$ ), 2.40 (s, 3H,  $H2$ ), 1.94 (br. s, 1H,  $\text{OH}$ ).

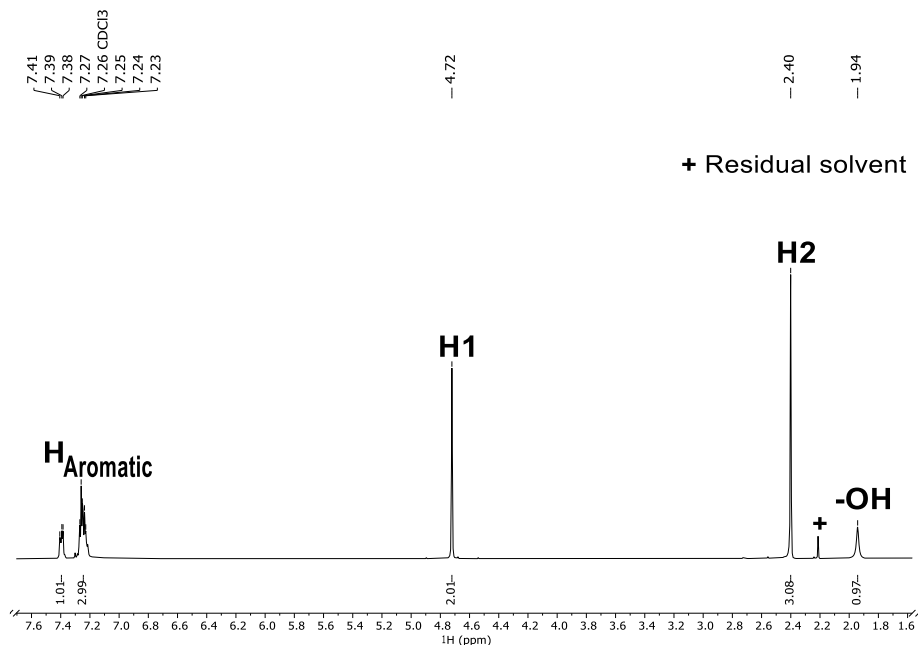

Figure S-25.  $^1\text{H NMR}$  (400 MHz) spectrum of 2-Methylbenzyl alcohol in  $\text{CDCl}_3$ .

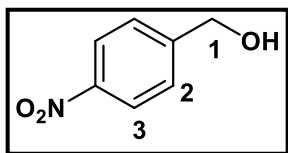

$^1\text{H NMR}$  (400 MHz,  $\text{CDCl}_3$ )  $\delta$  8.20 (d,  $^3J = 8.8$  Hz, 2H,  $H3$ ), 7.53 (d,  $^3J = 8.7$  Hz, 2H,  $H2$ ), 4.83 (s, 2H,  $H1$ ), 2.11 (br. s, 1H,  $\text{OH}$ ).

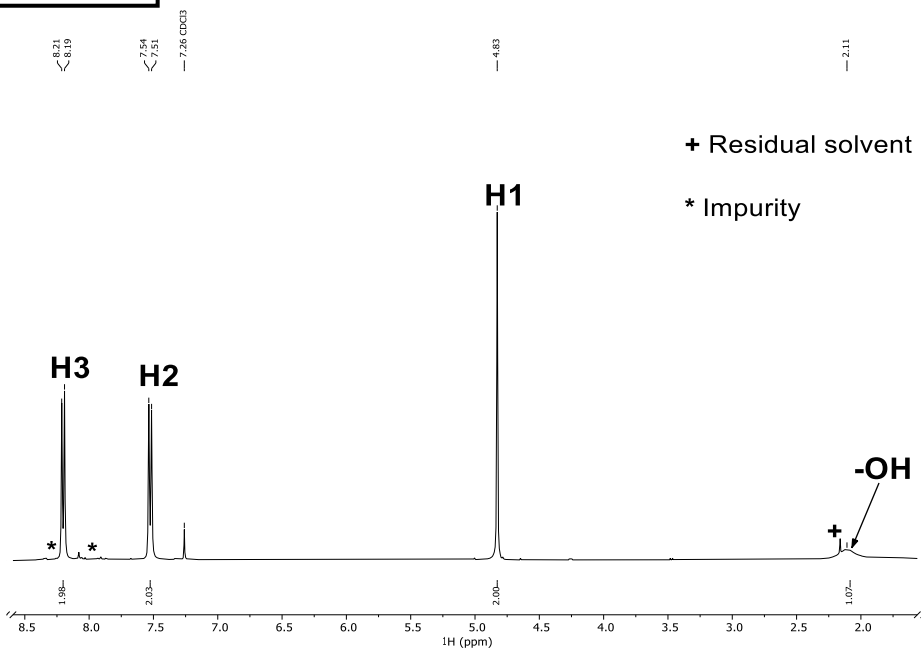

Figure S-26.  $^1\text{H NMR}$  (400 MHz) spectrum of 4-Nitrobenzylalcohol in  $\text{CDCl}_3$ .

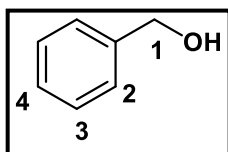

<sup>1</sup>H NMR (400 MHz, CDCl<sub>3</sub>) δ 7.24 (m, 5H, *H<sub>aromatic</sub>*), 4.59 (s, 2H, *H1*), 1.81 (br. s, 1H, *OH*).

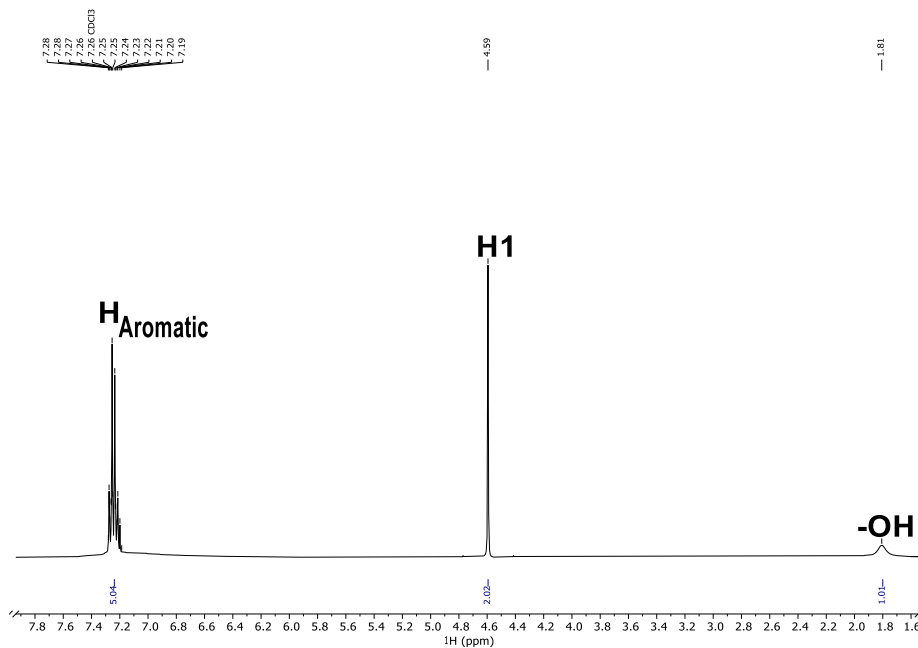

Figure S-27. <sup>1</sup>H NMR (400 MHz) spectrum of Benzyl alcohol in CDCl<sub>3</sub>.

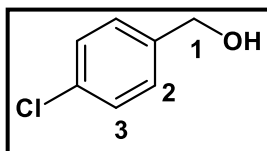

<sup>1</sup>H NMR (400 MHz, CDCl<sub>3</sub>) δ 7.32 (m, 4H, *H2*, *H3*), 4.67 (s, 2H, *H1*), 1.72 (br. s, 1H, *OH*).

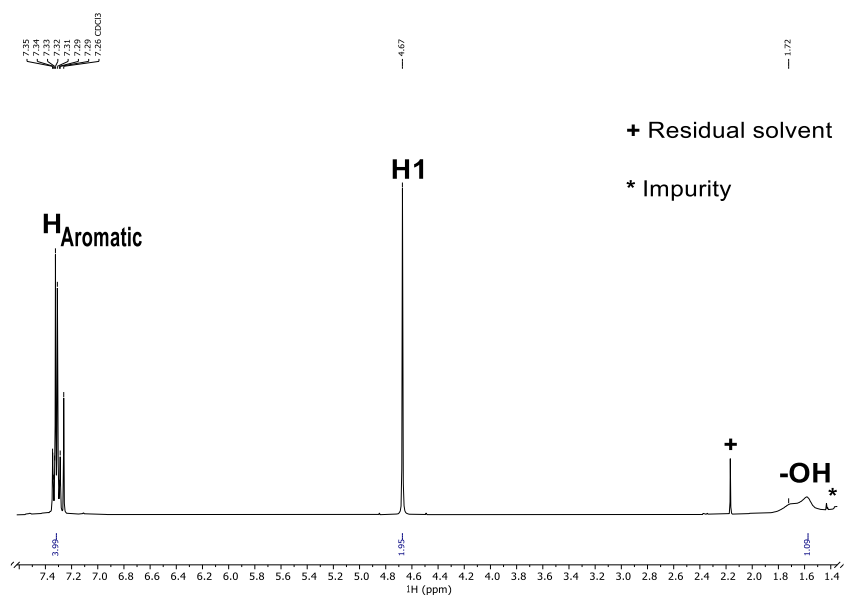

Figure S-28. <sup>1</sup>H NMR (400 MHz) spectrum of 4-Chlorobenzyl alcohol in CDCl<sub>3</sub>.
